# Supplementary material for: Assessing Osteopathic Medical Student Preparedness for Pre-Exposure Prophylaxis (PrEP) and HIV Prevention Care at Two U.S. Medical Schools
Source: Research Square preprint supplement (doi:10.21203/rs.3.rs-8641255/v1), 2026-02-20
Supplement: Supplementary file 1 [file 03da0971ea0ce481040a80be.docx]

| **Primary Care Specialties** | **Nonprimary Care Specialties** |
| --- | --- |
| Family medicine  Internal medicine  Obstetrics & gynecology  Pediatrics | Anesthesiology  Child neurology  Dermatology  Emergency medicine  Interventional radiology  Neurology  Neurosurgery  Ophthalmology  Orthopedic surgery  Otolaryngology (ENT)  Pathology  Physical medicine & rehabilitation  Plastic surgery  Psychiatry  Radiation oncology  Radiology  Surgery  Thoracic surgery  Urology  Vascular surgery  Other |
