# Supplementary material for: Assessing Osteopathic Medical Student Preparedness for Pre-Exposure Prophylaxis (PrEP) and HIV Prevention Care at Two U.S. Medical Schools
Source: Research Square preprint supplement (doi:10.21203/rs.3.rs-8641255/v1), 2026-02-20
Supplement: Supplementary file 2 [file 320578101a96c42d6c76e20c.docx]

**Informed Consent for Research Participation**

**Title of Project**: HIV Prevention and Care: A Comparative Study of Medical Students in the South and Midwest

**Investigator**: Dr. Robert Parker

We kindly invite you to participate in a research study (IRB# 24-07-09-001-ACOM) conducted by Kyle Roe (OMS-II) and Colton Boney (OMS-IV).

The purpose of this study is to assess medical students’ knowledge, perceptions, and attitudes toward HIV pre-exposure prophylaxis (PrEP) and patients living with HIV. By gathering this information, we aim to evaluate gaps in medical knowledge and how knowledge, perceptions, and attitudes change over the course of the medical school curriculum. **The survey is expected to take approximately 10 minutes to complete.**

**Participation in this study is voluntary, and your responses will remain anonymous.** No personal or identifying information will be collected. Your decision to participate or not will not impact your relationship with the Alabama College of Osteopathic Medicine (ACOM) or Marian University Tom and Julie Wood College of Osteopathic Medicine (MU-WCOM). **By submitting the survey, you are providing your informed consent to participate. You may choose to withdraw from the survey at any time.**

To be eligible for this study, you must be currently enrolled as a first-, second-, third-, or fourth-year student at ACOM or MU-WCOM. If you have any inquiries about the study, please feel free to reach out to the Principal Investigator Robert W. Parker, III, PharmD (rparker@acom.edu) or Researchers Kyle Roe OMS-II (roek5010@acom.edu) or Colton Boney OMS-IV (boneyc@acom.edu). For questions regarding your rights as a research subject, please contact the ACOM Institutional Review Board at IRB@acom.edu.

Part 1: DEMOGRAPHICS

**What medical school do you attend? (required)**

- Alabama College of Osteopathic Medicine
- Marian University Tom and Julie Wood College of Osteopathic Medicine

**To which year are you currently assigned for medical training? (required)**

- Class of 2028 (1st year)
- Class of 2027 (2nd year)
- Class of 2026 (3rd year)
- Class of 2025 (4th year or higher)

**How do you describe yourself?**

- Male
- Female
- Transgender male
- Transgender female
- Non-binary
- Intersex
- Agender
- Prefer to self-describe (write-in)
- Prefer not to say

**What race/ethnicity best describes you? (select all that apply)**

- American Indian/Native American or Alaska Native
- Asian
- Black or African American
- Native Hawaiian or Other Pacific Islander
- White
- Prefer to self-describe (write-in)
- Prefer not to say

**Are you of Spanish, Hispanic, or Latino origin?**

- Yes
- No
- Prefer not to say

**What medical specialty is currently your top choice that you are wanting/planning to match into?**

- Anesthesiology
- Child neurology
- Dermatology
- Emergency medicine
- Family medicine
- Internal medicine
- Interventional radiology
- Neurology
- Neurosurgery
- Obstetrics & gynecology
- Ophthalmology
- Orthopedic surgery
- Otolaryngology (ENT)
- Pathology
- Pediatrics
- Physical medicine & rehabilitation
- Plastic surgery
- Psychiatry
- Radiation oncology
- Radiology
- Surgery
- Thoracic surgery
- Urology
- Vascular surgery
- Other
- Unsure

Part 2: HIV/PrEP EDUCATION

**Have you received education on HIV or Pre-exposure prophylaxis (PrEP) in your pre-clinical medical school courses?**

- Yes
- No

Display this question:

If Have you received education on HIV or Pre-exposure prophylaxis (PrEP) in your pre-clinical medica... = No

**Prior to this survey, were you aware of HIV pre-exposure prophylaxis (PrEP) which are medications for HIV-negative individuals to help prevent them from contracting HIV? (E.g., Truvada, Descovy, Apretude)**

- Yes
- No

Display this question:

If To which year are you currently assigned for medical training? (required) = Class of 2027

Or To which year are you currently assigned for medical training? (required) = Class of 2026

Or To which year are you currently assigned for medical training? (required) = Class of 2025

**Do you believe the education you received on HIV care or PrEP was adequately covered in your pre-clinical medical school courses?**

- Strongly disagree
- Somewhat disagree
- Neither agree nor disagree
- Somewhat agree
- Strongly agree

Display this question:

If Do you believe the education you received on HIV care or PrEP was adequately covered in your pre-... = Somewhat disagree

Or Do you believe the education you received on HIV care or PrEP was adequately covered in your pre-... = Strongly disagree

**Which of the following topics related to HIV care and prevention do you feel could have been covered more adequately in your pre-clinical medical school courses? (Select all that apply)**

- HIV transmission and prevention strategies
- PrEP guidelines and prescribing
- Post-exposure prophylaxis (PEP)
- Patient education and counseling on HIV prevention
- Management of HIV-positive patients
- Other (write-in)

Part 3: HIV/PrEP HANDS-ON EXPERIENCES

Have you had any hands-on training or experiences with HIV prevention and care, including those who are HIV-positive, during your time in medical school (e.g., volunteering, clinical rotations, simulated/standardized patient cases, etc.)?

- Yes
- No
- Unsure

Display this question:

If Have you had any hands-on training or experiences with HIV prevention and care, including those w... = Yes

**What types of hands-on training or experiences with HIV prevention and care, including those who are HIV-positive, have you had during your time in medical school? (select all that apply)**

- Volunteer/community service
- Clinical rotations during 3rd and 4th year
- Research project(s)
- Simulated/standardized patient cases
- Other (write-in)

**How important do you believe it is for medical students to have hands-on experiences with HIV prevention and care, including those who are HIV-positive (e.g., simulated/standardized patient cases, clinical rotations, etc.)?**

- Not at all important
- Slightly important
- Moderately important
- Very important
- Extremely important

Display this question:

If To which year are you currently assigned for medical training? (required) = Class of 2026

Or To which year are you currently assigned for medical training? (required) = Class of 2025

**Have you ever discussed PrEP with a patient during your clinical rotations?**

- Yes
- No
- Unsure

Display this question:

If Have you ever discussed PrEP with a patient during your clinical rotations? = No

Or Have you ever discussed PrEP with a patient during your clinical rotations? = Unsure

**Have you ever witnessed an attending or other clinician discuss PrEP with a patient during your clinical rotations?**

- Yes
- No
- Unsure

Display this question:

If Have you ever discussed PrEP with a patient during your clinical rotations? = Yes

Or Have you ever witnessed an attending or other clinician discuss PrEP with a patient during your c... = Yes

**Who initiated most of the conversations/discussions about PrEP during your clinical rotations?**

- Patient
- Provider/attending
- Yourself
- Other (write-in)
- Unsure

Display this question:

If Have you ever discussed PrEP with a patient during your clinical rotations? = Yes

**How many times would you estimate discussing PrEP with patients during your clinical rotations?**

|  | 0 | 1 | 2 | 3 | 4 | 5 | 6 | 7 | 8 | 9 | 10 |
| --- | --- | --- | --- | --- | --- | --- | --- | --- | --- | --- | --- |

| Number of PrEP Discussions () | 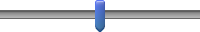 |
| --- | --- |

Display this question:

If What types of hands-on training or experiences with HIV prevention and care, including those who... = Clinical rotations during 3rd and 4th year

Or Have you ever discussed PrEP with a patient during your clinical rotations? = Yes

Or Have you ever witnessed an attending or other clinician discuss PrEP with a patient during your c... = Yes

**Please select which clinical rotations you are currently completing, have completed, have had experiences with HIV care, and/or discussed PrEP with patients. (select all that apply)**

|  | Currently completing | Completed | HIV care experience | PrEP discussion experience |
| --- | --- | --- | --- | --- |
| Family Medicine |  |  |  |  |
| Internal Medicine |  |  |  |  |
| Psychiatry |  |  |  |  |
| Pediatrics |  |  |  |  |
| Obstetrics & Gynecology |  |  |  |  |
| General Surgery |  |  |  |  |
| Rural Health |  |  |  |  |
| Emergency Medicine |  |  |  |  |
| Hospice |  |  |  |  |
| Elective/other (write-in) |  |  |  |  |
| Elective/other (write-in) |  |  |  |  |
| Not Applicable |  |  |  |  |

Part 4: CLINICAL SKILL PREPAREDNESS

**For each of the following, please choose how prepared you feel to do each task, where**

**1 = Not prepared at all and 5 = Extremely prepared.**

|  | 0 | 1 | 2 | 3 | 4 | 5 |
| --- | --- | --- | --- | --- | --- | --- |

| Handle various aspects of PrEP care, including counseling on adherence, creating follow-up plans, and identifying eligible patients () | 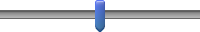 |
| --- | --- |
| Take a comprehensive sexual history () | 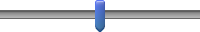 |
| Discuss HIV prevention strategies other than PrEP (e.g., condoms, harm reduction practices, etc.) () | 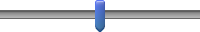 |
| Integrate PrEP discussions into routine healthcare visits () | 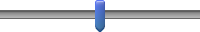 |

Part 5: ATTITUDES TOWARD PREP

**Do you believe prescribing PrEP is an effective way to prevent HIV?**

- Strongly disagree
- Somewhat disagree
- Neither agree nor disagree
- Somewhat agree
- Strongly agree

Display this question:

If Do you believe prescribing PrEP is an effective way to prevent HIV? = Neither agree nor disagree

Or Do you believe prescribing PrEP is an effective way to prevent HIV? = Somewhat disagree

Or Do you believe prescribing PrEP is an effective way to prevent HIV? = Strongly disagree

**What methods do you believe are more effective than PrEP at preventing HIV? (select all that apply)**

- Abstinence from sex
- Consistent condom use
- Using sterile drug injection equipment
- Only having sex with partners of the same HIV status
- Limiting the number of sexual partners
- Getting tested for HIV regularly
- Other (write-in)

**Would you be willing to prescribe PrEP to eligible patients in your future practice?**

- Yes
- No
- Unsure

Display this question:

If Would you be willing to prescribe PrEP to eligible patients in your future practice? = No

Or Would you be willing to prescribe PrEP to eligible patients in your future practice? = Unsure

**Why would you not be willing to prescribe PrEP to eligible patients in your future practice? (select all that apply)**

- Beliefs about PrEP efficacy
- Personal morals/beliefs
- Religious objections
- Belief that it is another specialty's role/responsibility
- Belief that it could encourage risky sexual behaviors
- Don’t know enough about PrEP
- Other (write-in)
- Prefer not to say

Part 6: ATTITUDES CARING FOR PATIENTS IN HIGH-RISK GROUPS

The following questions refer to patients who are at high risk of HIV infection and are considered priority populations according to the National HIV/AIDS Strategy (NHAS). Those in this high-risk group include:

Gay, bisexual and other men who have sex with men, especially Black, Latino, and American Indian/Alaska Native men

Black women  Transgender women

Youth aged 13-24

People who inject drugs

**Based on your current level of medical training, how prepared do you feel to provide HIV preventative care to patients in high-risk groups of contracting HIV?**

- Not at all prepared
- Slightly prepared
- Moderately prepared
- Very prepared
- Extremely prepared

Display this question:

If Based on your current level of medical training, how prepared do you feel to provide HIV preventa... = Moderately prepared

Or Based on your current level of medical training, how prepared do you feel to provide HIV preventa... = Slightly prepared

Or Based on your current level of medical training, how prepared do you feel to provide HIV preventa... = Not at all prepared

**What high-risk groups do you feel the most unprepared to provide HIV preventative care for? (select all that apply)**

- Gay, bisexual, and other men who have sex with men
- Black women
- Transgender women
- Youth aged 13-24
- People who inject drugs
- Other (write-in)

**Do you believe PrEP counseling should be part of routine discussions with high-risk patient populations?**

- Strongly disagree
- Somewhat disagree
- Neither agree nor disagree
- Somewhat agree
- Strongly agree

Part 7: ATTITUDES CARING FOR HIV-POSITIVE PATIENTS

**How comfortable do you feel caring for patients who are HIV-positive?**

- Extremely uncomfortable
- Somewhat uncomfortable
- Neither comfortable nor uncomfortable
- Somewhat comfortable
- Extremely comfortable

**Would you consider working in a community with a high prevalence of HIV?**

- Yes
- No
- Unsure

Display this question:

If Would you consider working in a community with a high prevalence of HIV? = Yes

**How likely are you to pursue additional training or specialization in HIV care?**

- Extremely unlikely
- Somewhat unlikely
- Neither likely nor unlikely
- Somewhat likely
- Extremely likely
